# Supplementary material
Source: publisher figshare collection journal article supplement (https://gsajournals.figshare.com/ndownloader/files/20397861)
Supplement: Supplementary file 1 [file 20397861]

## Sheet: Revised
Locus	Chr	Pos	SNP	Gene Name	Annotation	GO Terms
1	1	4015639	ss715579324	Glyma.01g037800	Germin-like protein 7	Extracellular region, cell wall, manganese ion binding, nutrient reservoir activity, metal ion binding
				Glyma.01g037900	Glucosyl transferase family 8	Transferase activity
2	1	51961463	ss715580187	Glyma.01g184200	Peroxidase superfamily protein	Response to oxidative stress, oxidation-reduction process, peroxidase activity, metal ion binding
				Glyma.01g184300	CDPK-related kinase	Protein phosphorylation, protein kinase activity, ATP binding
				Glyma.01g184400	SAP domain-containing protein	Nucleic acid binding
3	2	3165348	ss715581823	Glyma.02g034000	Aldehyde dehydrogenase 2B7	Metabolic process, oxidation-reduction process, aldehyde dehydrogenase activity
				Glyma.02g034100	Disease resistance protein (TIR-NBS-LRR class) family	ADP binding
				Glyma.02g034200	ARM repeat superfamily protein	Protein ubiquitination, protein binding, transferase activity
				Glyma.02g034300	Splicing factor PWI domain-containing protein / RNA recognition motif (RRM)-containing protein	mRNA processing, nucleic acid binding, RNA binding
4	2	42073473	ss715582842	Glyma.02g233100	O-methyltransferase family protein	Aromatic compound biosynthetic process, methylation, methyltransferase activity
				Glyma.02g233200	Major facilitator superfamily protein	Integral component of membrane
5	4	46096228	ss715588277	Glyma.04g190100	31-kDa RNA binding protein	Nucleic acid binding, RNA binding
				Glyma.04g190200	Protein-l-isoaspartate methyltransferase 1	Cellular protein modification process, protein methylation, methyltransferase activity
				Glyma.04g190300	N/A	Phloem development, integral component of membrane
6	5	6207961	ss715592288	Glyma.05g063800	Ubiquitin C-terminal hydrolase 3	Proteolysis, ubiquitin-dependent protein catabolic process, integral component of membrane, peptidase activity, hydrolase activity
				Glyma.05g063900	ATP-dependent caseinolytic (Clp) protease/crotonase family protein	Fatty acid beta-oxidation, metabolic process, catalytic activity
7	5	41387548	ss715591700	Glyma.05g237500	Zinc finger protein-related	Protein binding, zinc ion binding
8	6	13090474	ss715592991	Glyma.06g158800	Eukaryotic aspartyl protease family protein	Proteolysis, protein catabolic process, peptidase activity, hydrolase activity
9	6	14258126	ss715593189	Glyma.06g170300	Purple acid phosphatase 27	Dephosphorylation, acid phosphatase activity, hydrolase activity, metal ion binding
10	6	47633030	ss715594738	Glyma.06g287400	GDSL-like Lipase/Acylhydrolase superfamily protein	Lipid metabolic process, hydrolase activity
11	6	49189084	ss715595012	Glyma.06g302500	TraB family protein	N/A
				Glyma.06g302600	Peroxidase superfamily protein	Response to oxidative stress, oxidation-reduction process, peroxidase activity, metal ion binding
12	7	11177483	ss715596171	Glyma.07g110000	Integrase-type DNA-binding superfamily protein	Transcription, DNA binding
				Glyma.07g110100	Zinc finger (C3HC4-type RING finger) family protein	Regulation of seed germination, protein ubiquitination
13	8	1699023	ss715599875	Glyma.08g020900	Cytokinin response factor 2	Transcription, DNA binding
14	8	9837263	ss715602901	Glyma.08g127400	Protein kinase superfamily protein	Protein phosphorylation, protein kinase activity, ATP binding
				Glyma.08g127600	RmlC-like cupins superfamily protein	Nutrient reservoir activity
				Glyma.08g127700	Phosphatidylinositol-4-phosphate 5-kinase family protein	Phosphorylation, nucleotide binding, ATP binding, kinase activity, transferase activity
15	8	34471238	ss715601484	N/A	N/A	N/A
16	9	1769730	ss715603168	Glyma.09g022100	Glycolipid transfer protein (GLTP) family protein	Glycolipid transport, intermembrane lipid transport, glycolipid binding
				Glyma.09g022200	Cleavage and polyadenylation specificity factor 30	RNA binding, metal ion binding
17	9	36942176	ss715603680	Glyma.09g149400	Carboxyesterase 20	Metabolic process, catabolic process, hydrolase activity
				Glyma.09g149500	Phragmoplast-associated kinesin-related protein, putative	Microtubule-based movement, kinesin complex, nucleotide binding, ATP binding
18	10	270252	ss715606054	Glyma.10g002500	TBP-associated factor 13	Regulation of transcription by RNA polymerase II, DNA binding, transcription cofactor activity
				Glyma.10g002600	Ribosomal L28 family	Translation, structural constituent of ribosome
19	10	3598580	ss715606348	Glyma.10g040800	Hydroxyproline-rich glycoprotein family protein	mRNA binding, mRNA 3'-end processing
				Glyma.10g040900	Tetratricopeptide repeat (TPR)-like superfamily protein	Protein binding
				Glyma.10g041000	GroES-like zinc-binding dehydrogenase family protein	Ethanol oxidation, oxidation-reduction process, zinc ion binding, metal ion binding
				Glyma.10g041100	Beta-ketoacyl synthase	Fatty acid beta-oxidation, metabolic process, catalytic activity, transferase activity
20	10	23376136	ss715605804	N/A	N/A	N/A
21	10	30831897	ss715606157	N/A	N/A	N/A
22	11	31929823	ss715610250	Glyma.11g224500	Major facilitator superfamily protein	Transport, transmembrane transport, integral component of membrane, transporter activity
23	12	2053039	ss715611755	Glyma.12g027700	Tetratricopeptide repeat (TPR)-containing protein	Regulation of transcription by RNA polymerase II, protein binding, regulation of nucleic acid-templated transcription
				Glyma.12g027800	Alanyl-tRNA synthetase	tRNA modification, translation, alanyl-tRNA aminoacylation, cytoplasm, mitochondrion, chloroplast
24	12	2839426	ss715612002	Glyma.12g039200	Minichromosome maintenance (MCM2/3/5) family protein	DNA replication, photosynthesis, chlorophyll biosynthetic process, MCM complex, DNA binding
				Glyma.12g039300	Vacuolar proton ATPase A3	Ion transport, vacuolar acidification, ATP synthesis, ATP hydrolysis
25	13	29459954	ss715614803	Glyma.13g181200	Sensitive to freezing 6	Regulation of transcription, mediator complex
				Glyma.13g181400	Protein kinase superfamily protein	Protein phosphorylation, protein kinase activity, ATP binding
26	14	3078346	ss715618273	Glyma.14g040900	LA RNA-binding protein	RNA binding
				Glyma.14g041000	Thioesterase superfamily protein	Metabolic process, oxidoreductase activity
				Glyma.14g041100	Argonaute family protein	Gene silencing by RNA, nucleic acid binding, protein binding
27	14	10057919	ss715617366	Glyma.14g101500	Class II aminoacyl-tRNA and biotin synthetases superfamily protein	tRNA aminoacylation for protein translation, cytoplasm, nucleotide binding
				Glyma.14g101600	P-loop containing nucleoside triphosphate hydrolases superfamily protein	ATP binding
				Glyma.14g101700	Sas10/Utp3/C1D family	Exosome (RNase complex), nucleus
28	14	43597753	ss715618915	N/A	N/A	N/A
29	15	12437556	ss715620442	N/A	N/A	N/A
30	15	50499617	ss715622647	Glyma.15g268400	Cofactor of nitrate reductase and xanthine dehydrogenase 2	Mo-molybdopterin cofactor biosynthetic process, catalytic activity, metal ion binding, iron-sulfur cluster binding
				Glyma.15g268500	Citrate synthase family protein	Tricarboxylic acid cycle, citrate metabolic process, transferase activity
				Glyma.15g268600	Tetratricopeptide repeat (TPR)-like superfamily protein	RNA modification, nucleic acid phosphodiester bond hydrolysis, integral component of membrane, RNA binding
31	15	51622014	ss715622805	Glyma.15g276800	Magnesium ion binding;thiamin pyrophosphate binding;hydro-lyases;catalytics;2-succinyl-5-enolpyruvyl-6-hydroxy-3-cyclohexene-1-carboxylic-acid synthases	Metabolic process, cellular amino acid catabolic process, membrane, catalytic activitiy, hydrolase activity
32	16	164715	ss715623538	Glyma.16g003000	DNA-binding bromodomain-containing protein	Protein binding
				Glyma.16g003100	Pseudouridine synthase family protein	Pseudouridine synthesis, tRNA processing, RNA modification, RNA binding
				Glyma.16g003200	Evolutionarily conserved C-terminal region 11	RNA binding
	16	517535	ss715625192	Glyma.16g006400	Disease resistance protein (TIR-NBS-LRR class) family	Defense response, signal transduction, protein binding, ADP binding
				Glyma.16g006500	TRF-like 6	Telomeric loop formation, nuclear telomere cap complex, DNA binding
33	17	9384325	ss715628378	Glyma.17g118400	RING/FYVE/PHD zinc finger superfamily protein	Membrane, integral component of membrane, zinc ion binding
				Glyma.17g118500	Plant natriuretic peptide A	N/A
				Glyma.17g118600	Transducin/WD40 repeat-like superfamily protein	Protein binding
				Glyma.17g118700	3-ketoacyl-CoA synthase 11	Fatty acid biosynthetic process, metabolic process, lipid biosynthetic process, catalytic activity
34	17	31794022	ss715626726	N/A	N/A	N/A
35	17	36227875	ss715626968	Glyma.17g215500	KNOTTED1-like homeobox gene 3	Regulation of transcription, response to light stimulus, DNA binding
36	18	46860521	ss715631153	N/A	N/A	N/A
37	18	54371258	ss715632037	Glyma.18g258000	HXXXD-type acyl-transferase family protein	Transferase activity
				Glyma.18g258100	O-acyltransferase (WSD1-like) family protein	Triglyceride biosynthetic process, glycerolipid biosynthetic process, plasma membrane
				Glyma.18g258200	Leucine-rich repeat receptor-like protein kinase family protein	Protein phosphorylation, protein kinase activity, ATP binding
				Glyma.18g258300	Leucine-rich repeat receptor-like protein kinase family protein	Protein phosphorylation, protein kinase activity, ATP binding
				Glyma.18g258400	Homeobox protein 20	Regulation of transcription, nucleus, DNA binding
38	19	809326	ss715636293	Glyma.19g008100	GDSL-like Lipase/Acylhydrolase superfamily protein	Lipid metabolic process, hydrolase activity
				Glyma.19g008200	Tetratricopeptide repeat (TPR)-like superfamily protein	Protein binding
39	19	38109922	ss715634688	Glyma.19g122800	ABA-responsive element binding protein 3	Regulation of transcription, DNA binding
				Glyma.19g122900	RNA-binding (RRM/RBD/RNP motifs) family protein	Nucleic acid binding, RNA binding
40	19	45307395	ss715635460	Glyma.19g195800	NAC domain containing protein 61	Transcription, DNA binding
				Glyma.19g195900	Vacuolar protein sorting 55 (VPS55) family protein	Late endosome to vacuole transport, endosome, membrane
				Glyma.19g196000	Tetratricopeptide repeat (TPR)-like superfamily protein	Protein binding
41	20	294010	ss715637218	Glyma.20g003100	Peptidoglycan-binding LysM domain-containing protein	Cell wall macromolecule catabolic process
				Glyma.20g003300	Glycosyl hydrolase 9B9	Polysaccharice catabolic process, carbohydrate metabolic process, catalytic activity
42	20	39013106	ss715637991	Glyma.20g151400	Stabilizer of iron transporter SufD / Polynucleotidyl transferase	Gene silencing by RNA, nucleic acid binding, protein binding
43	20	46438247	ss715638748	Glyma.20g230200	Vamp/synaptobrevin-associated protein 27-2	Endoplasmic reticulum membrane, structural molecule activity
				Glyma.20g230300	Dehydroquinate dehydratase, putative / shikimate dehydrogenase, putative	Chorismate biosynthetic process, shikimate metabolic process, chloroplast stroma
				Glyma.20g230400	DNAJ heat shock N-terminal domain-containing protein	Cytosol
44	20	47435005	ss715638900	Glyma.20g244000	Protein kinase family protein	Protein phosphorylation, protein kinase activity, ATP binding
				Glyma.20g244100	Peptidase M1 family protein	Proteolysis, peptide catabolic process, binding, peptide binding, zinc ion binding
				Glyma.20g244200	Tonneau 1b (TON1b)	Protein binding
				Glyma.20g244300	Protein phosphatase 2C family protein	Protein dephosphorylation, catalytic activity, cation binding
